# Supplementary material for: Functional construction of a water-stable Tb-coordination polymer luminescent sensor for highly selective detection of picric acid in an aquatic environment
Source: Royal Society of Chemistry journal article supplement (doi:10.1039/c9dt04153b), 2019-01-01
Supplement: c9dt04153b1.pdf [file c9dt04153b1.pdf]

## Supporting Information

### Functional Construction a Water-stable Tb-Coordination Polymer Luminescent Sensor for Highly Selective Detecting Picric Acid in Aquatic Environment

*Wei Liu*<sup>a,b</sup>, *Chengdong Liu*<sup>a</sup>, *Chunyang Chen*<sup>c</sup>, *Xin Huang*<sup>a</sup>, *Weisheng Liu*<sup>\*a</sup>

<sup>a</sup>Key Laboratory of Nonferrous Metals Chemistry and Resources Utilization of Gansu Province, State Key Laboratory of Applied Organic Chemistry and College of Chemistry and Chemical Engineering, Lanzhou University, Lanzhou 730000, China, E-mail: liuws@lzu.edu.cn.

<sup>b</sup>School of Physical Science and Technology, Lanzhou University, Lanzhou 730000, China.

<sup>c</sup>College of Earth and Environmental Sciences, Lanzhou University, Lanzhou 730000, China.

Lanzhou 730000 (P.R. China). \*E-mail: liuws@lzu.edu.cn. Tel: +86-931-8915151.

College of Earth and Environmental Sciences, Lanzhou University, Lanzhou 730000, China.

**Materials and Instrumentation:** All solvents and reagents were commercially available A.R. grade and used without further purification unless otherwise noted. Preparation of stock solutions: All the analytic nitro explosives solutions were prepared by separately dissolving each of them DMF with a concentration of 0.1 M. River water samples were taken from Lanzhou section of the Yellow River. Tap water samples were taken from the Second Chemical Building of Lanzhou University. Water samples need to be precipitated for 12 hours before testing and filtered to remove solid insolubles. Luminescence spectra were measured using a Hitachi F-7000 luminescence spectrometer. Fluorescent quantum yields were determined by an absolute method using

an integrating sphere on FLS920 of Edinburgh Instrument. UV-visible spectra were recorded using an Agilent Cary 5000 spectrophotometer. The FT-IR spectra were recorded from KBr pellets in the range from 4000 to 400  $\text{cm}^{-1}$  on a Bruker VERTEX 70 spectrometer. Powder X-Ray diffraction (PXRD) patterns were collected with a PANalytical X'Pert Pro Diffractometer operated at 40 kV and 40 mA with Cu  $K\alpha$  radiation. Thermogravimetric analyses (TGA) were obtained on a NETZSCH STA 449 F3 Jupiter® under a  $\text{N}_2$  atmosphere. Elemental analyses were performed using an Elementar Analysensysteme GmbH varioEL cube instrument.

**X-ray Structural Crystallography:** The single-crystal X-ray diffraction data was collected on an Agilent Super Nova Single Crystal Diffractometer equipped with graphite-monochromatic Mo- $K\alpha$  source ( $\lambda=0.71073$  Å). An empirical absorption correction based on a comparison of redundant and equivalent reflections was applied by using SADABS. All of the structures were solved by direct methods using SHELXTL-97<sup>[1]</sup> and refined by full-matrix least-squares cycles on  $F^2$ . All the non-hydrogen atoms were refined anisotropically. The crystal data is listed in Table S1-S3.

**Calculations of Luminescent Quantum Yield:** Luminescent quantum yield data were measured in the solid state at 298K, and the emission was monitored from 450 to 650 nm. The overall luminescent quantum yields of the solid-state samples were determined by an absolute method using an integrating sphere on FLS920 of Edinburgh Instrument (150 mm diameter,  $\text{BaSO}_4$  coating) and acquired using the following equation:

$$\Phi_{\text{overall}} = (A_{\text{H}}) / (R_{\text{ST}} - R_{\text{H}}) \quad (1)$$

where  $A_{\text{H}}$  is the area under emission spectrum of the sample and  $R_{\text{ST}}$  and  $R_{\text{H}}$  are diffuse reflectance of the reflecting standard and the sample, respectively.<sup>[1]</sup>

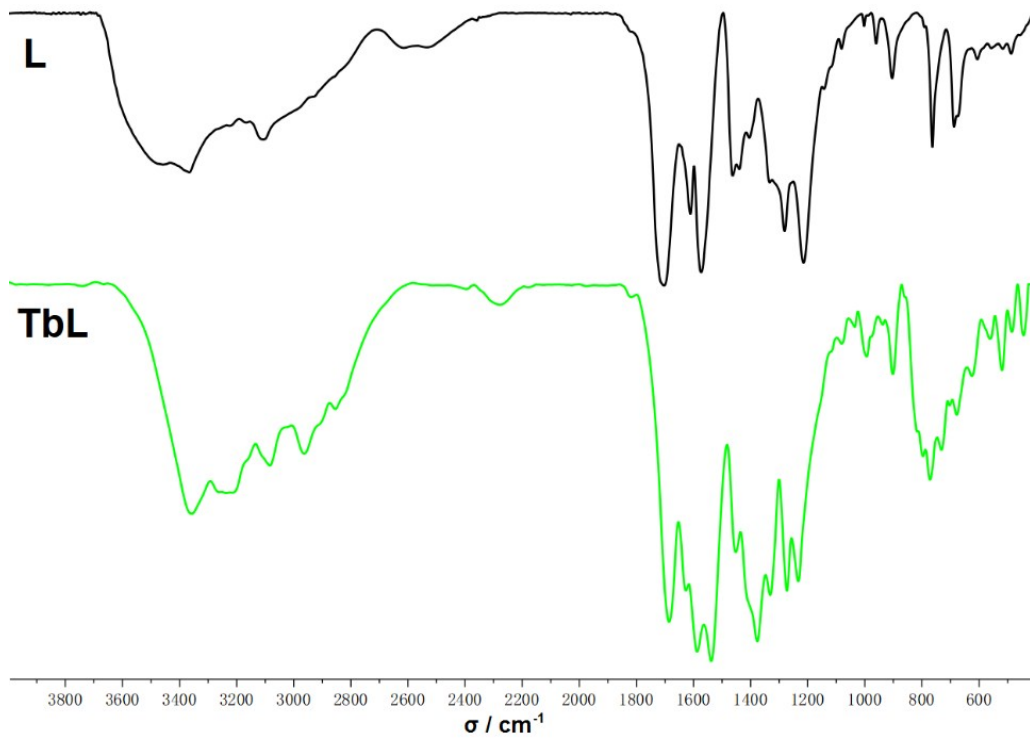

**Figure S1.** IR spectra of TbL and L.

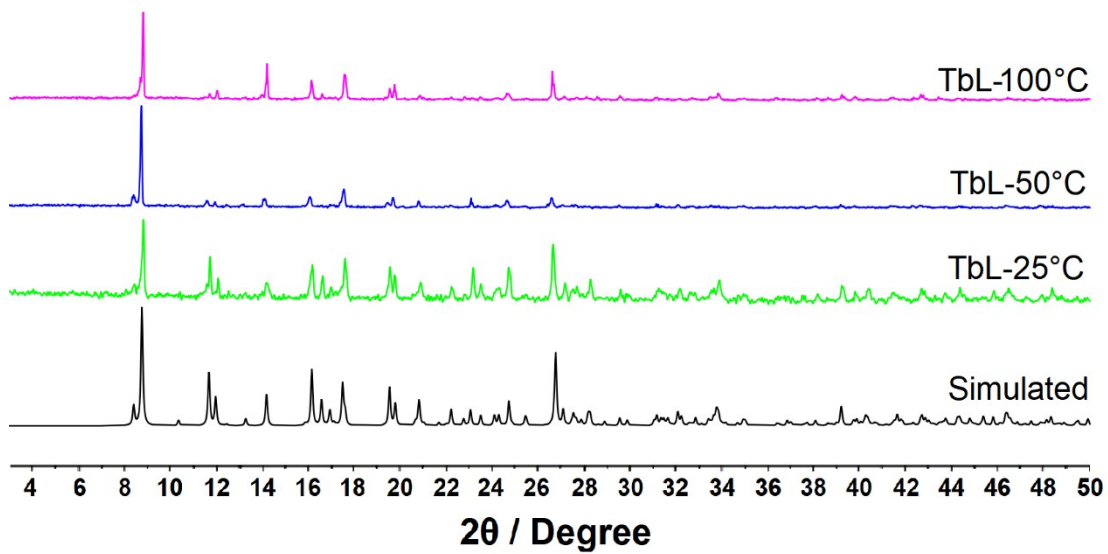

**Figure S2.** The PXRD of TbL after treatment at different temperatures.

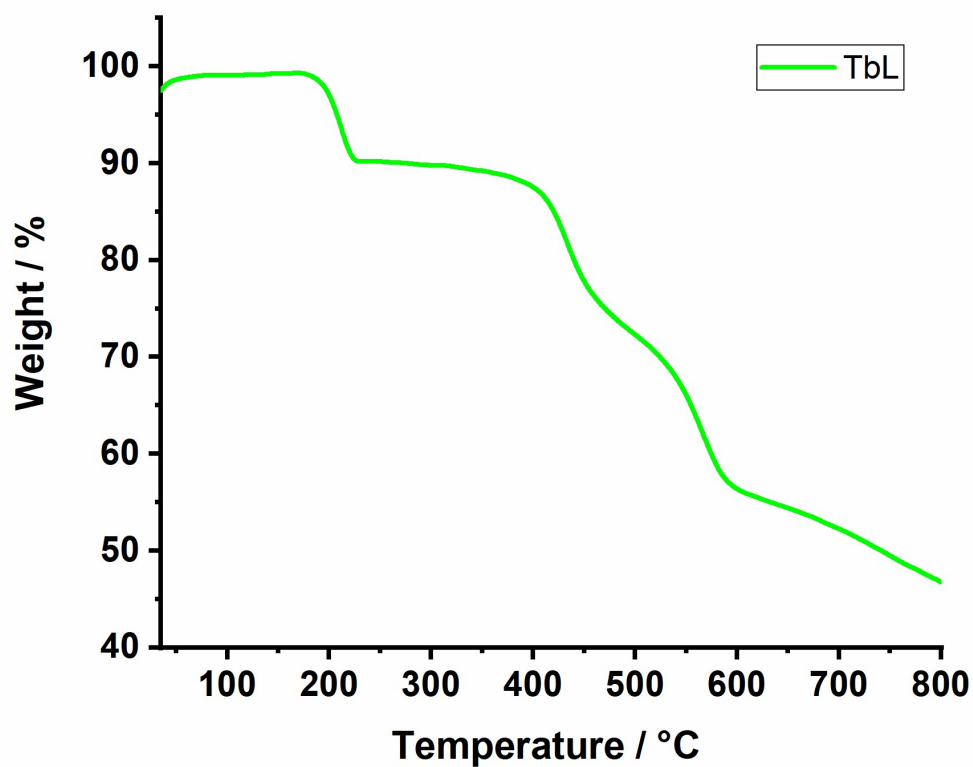

Figure S3. TGA Plot of TbL.

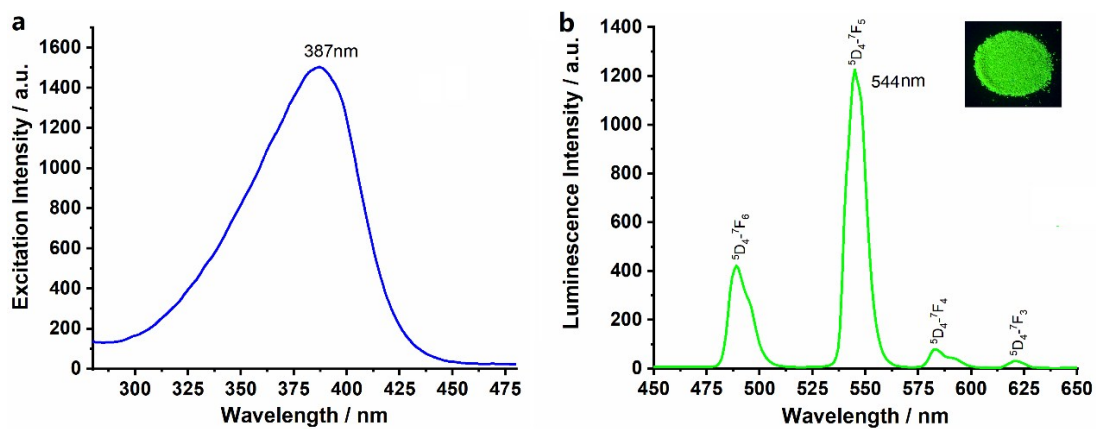

Figure S4. a) The solid-state excitation spectrum of TbL at room temperature (em = 545 nm). b) The solid-state emission spectrum of TbL at room temperature (ex = 387 nm). Inset: the corresponding luminescence pictures under UV-light irradiation of 365 nm.

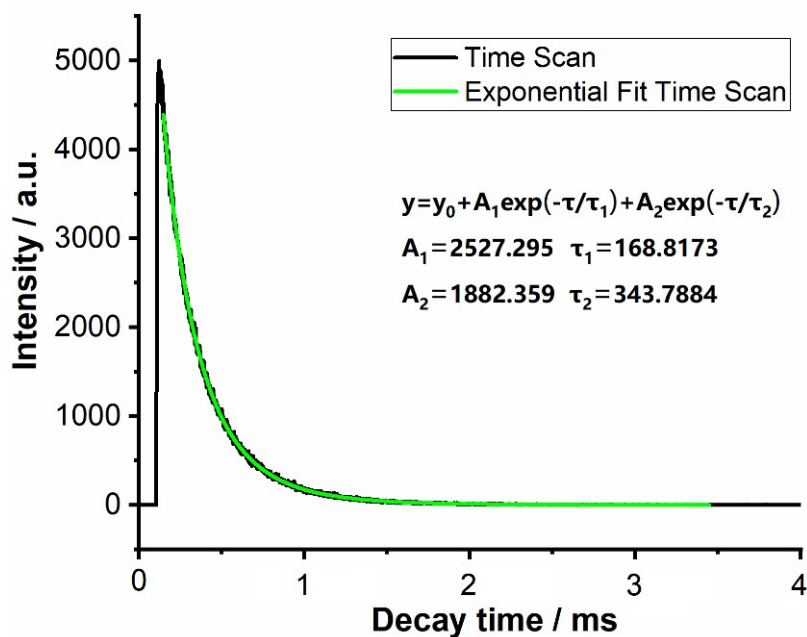

**Figure S5.** The luminescence decay profiles of TbL.

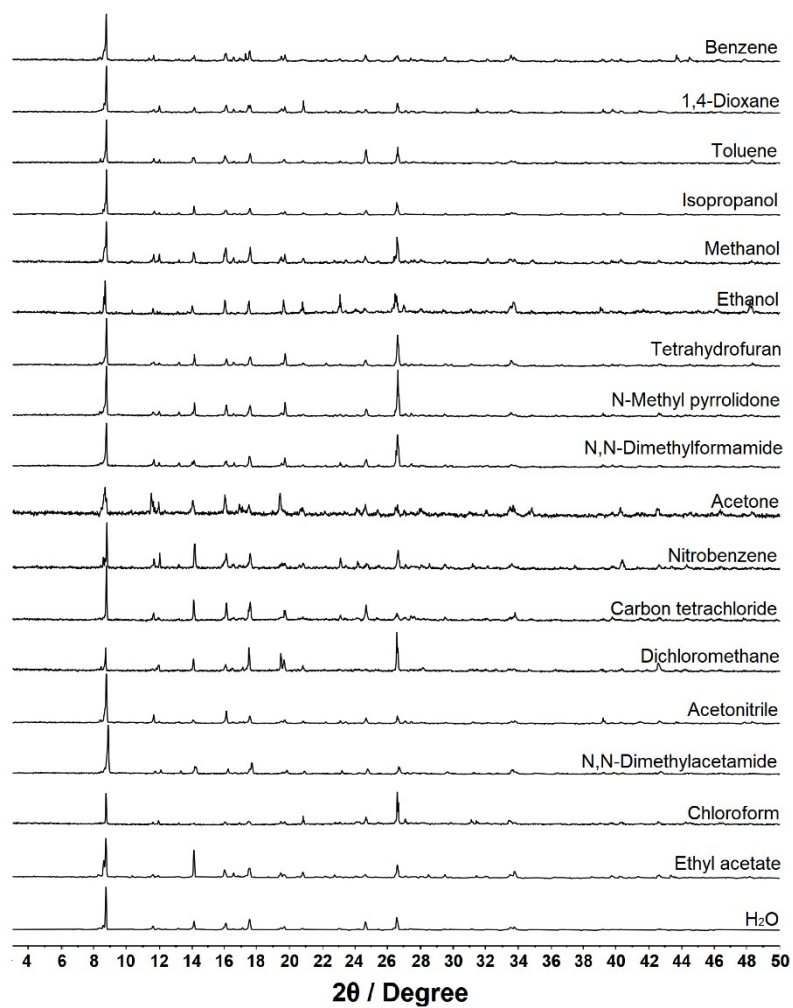

**Figure S6.** The PXRD of TbL treated with various solvents.

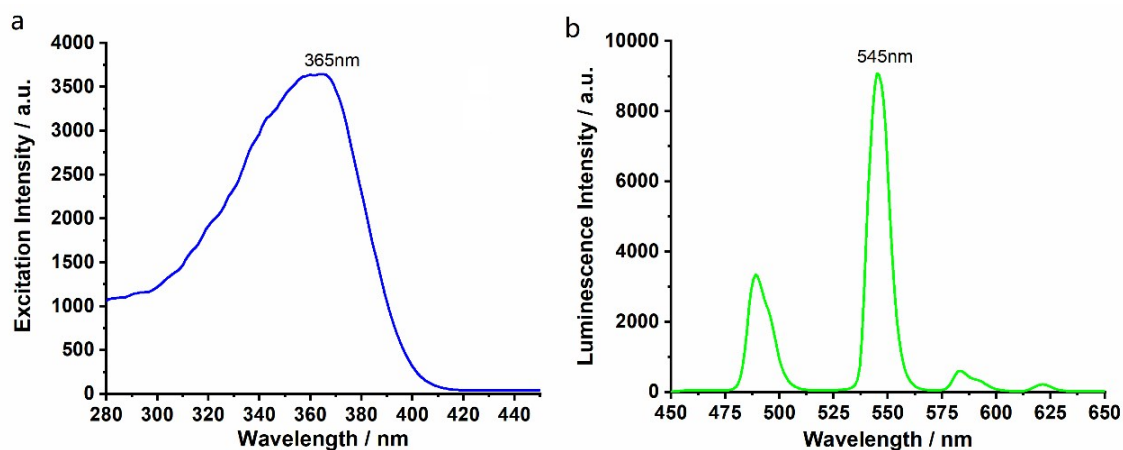

**Figure S7.** a) The excitation spectrum of TbL in deionized water ( $\lambda_{em} = 545$  nm). b) The emission spectrum of TbL in deionized water ( $\lambda_{ex} = 365$  nm).

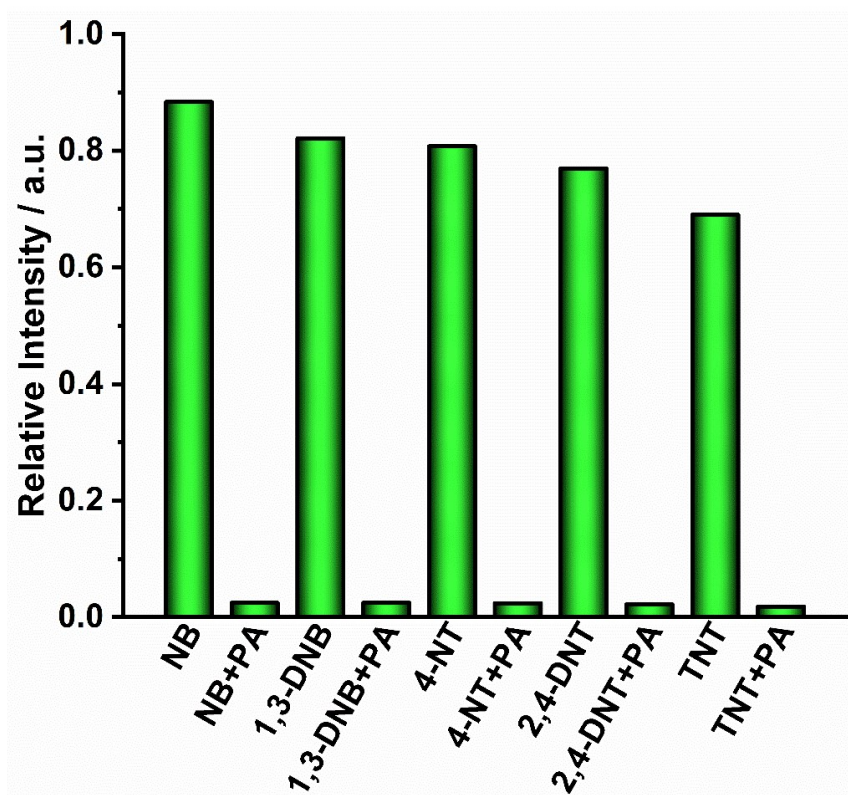

**Figure S8.** Luminescence responses of TbL to PA (0.5 mM) in the presence of other nitro explosives (0.5 mM) in deionized water ( $\lambda_{ex} = 365$  nm).

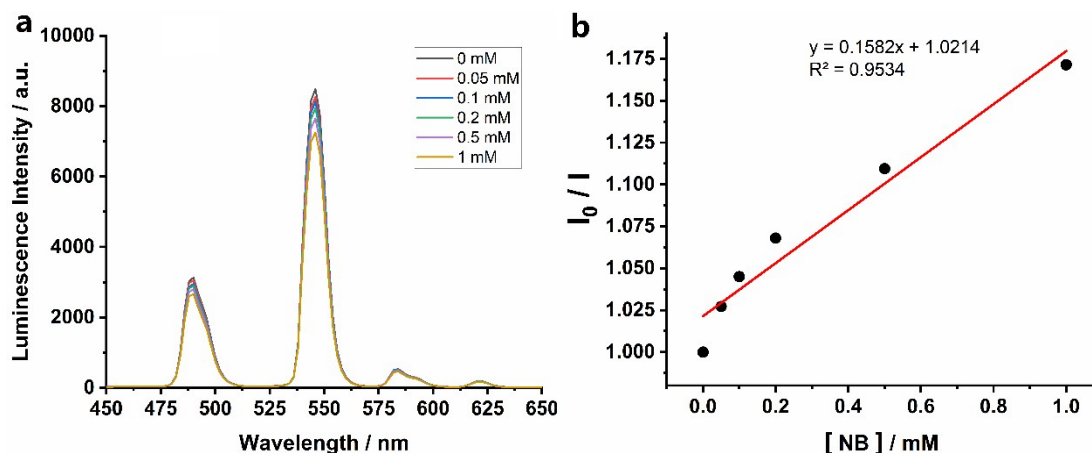

**Figure S9.** a) Luminescence responses of TbL toward different concentrations of NB (0-1 mM) in deionized water. (ex = 365 nm) b) Stern-Volmer plot of  $I_0/I$  versus increasing concentrations of NB.

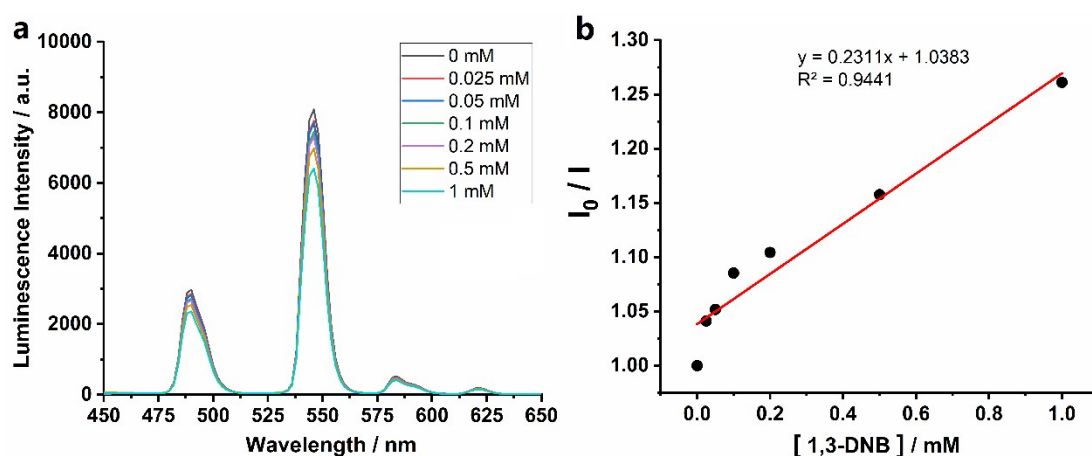

**Figure S10.** a) Luminescence responses of TbL toward different concentrations of 1,3-DNB (0-1 mM) in deionized water. (ex = 365 nm) b) Stern-Volmer plot of  $I_0/I$  versus increasing concentrations of 1,3-DNB.

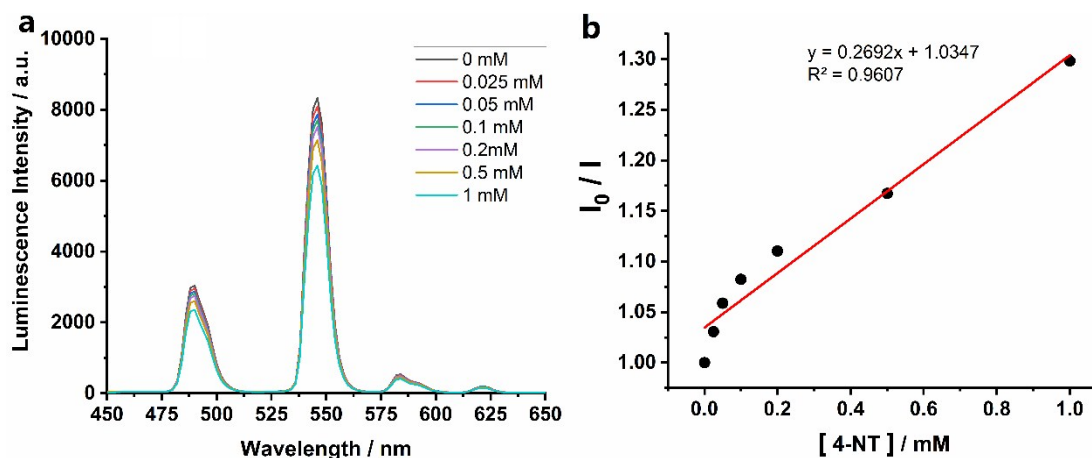

**Figure S11.** a) Luminescence responses of TbL toward different concentrations of 4-NT (0-1 mM) in deionized water. (ex = 365 nm) b) Stern-Volmer plot of  $I_0/I$  versus increasing concentrations of 4-NT.

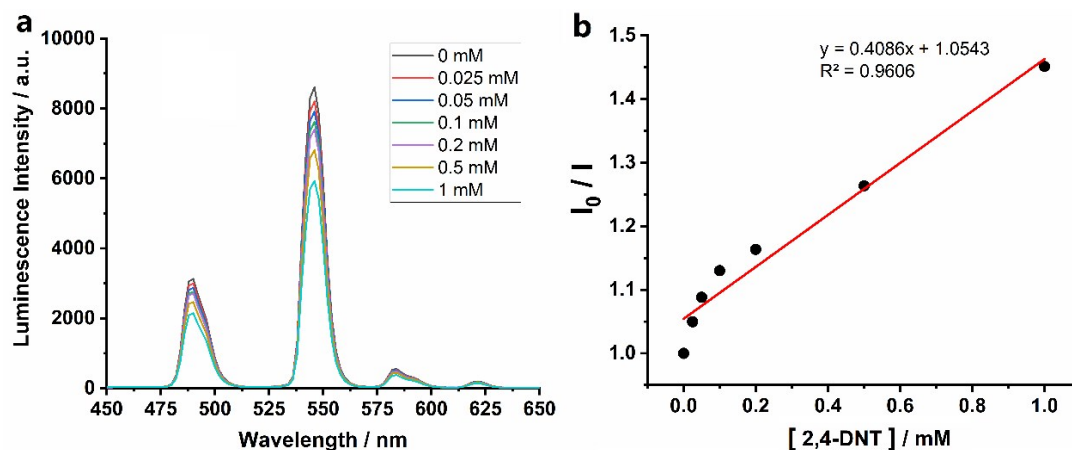

**Figure S12.** a) Luminescence responses of TbL toward different concentrations of 2,4-DNT (0-1 mM) in deionized water. (ex = 365 nm) b) Stern-Volmer plot of  $I_0/I$  versus increasing concentrations of 2,4-DNT.

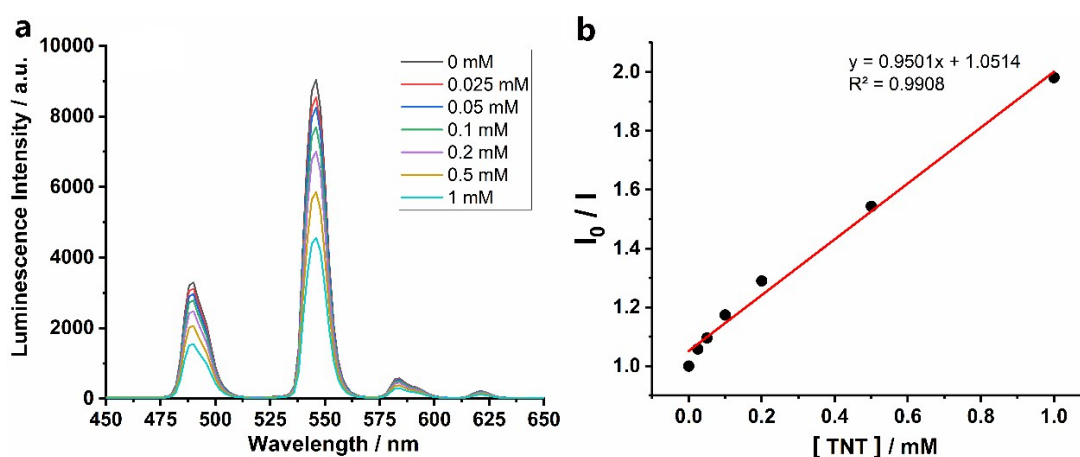

**Figure S13.** a) Luminescence responses of TbL toward different concentrations of TNT (0-1 mM) in deionized water. (ex = 365 nm) b) Stern-Volmer plot of  $I_0/I$  versus increasing concentrations of TNT.

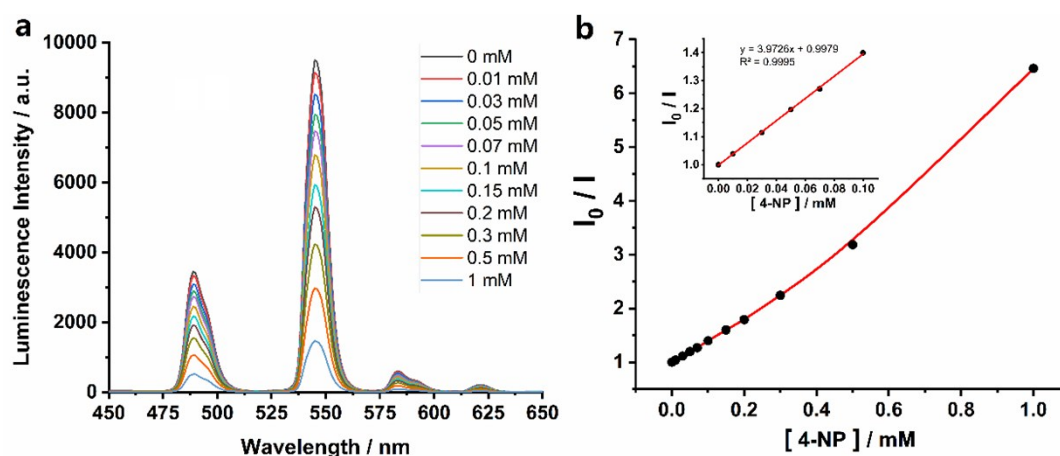

**Figure S14.** a) Luminescence responses of TbL toward different concentrations of 4-NP (0-1 mM) in deionized water. (ex = 365 nm) b) Stern-Volmer plot of  $I_0/I$  versus increasing concentrations of 4-NP.



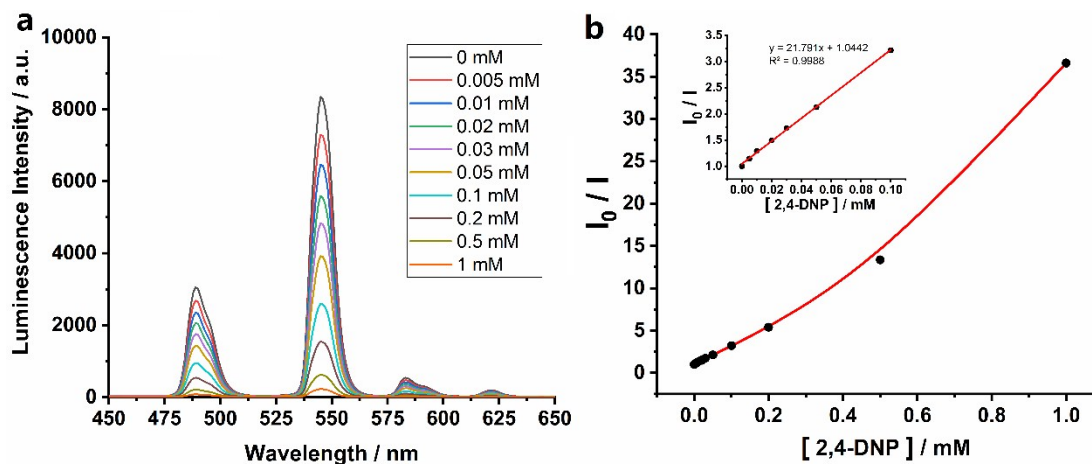

**Figure S15.** a) Luminescence responses of TbL toward different concentrations of 2,4-DNP (0-1 mM) in deionized water. (ex = 365 nm) b) Stern-Volmer plot of  $I_0/I$  versus increasing concentrations of 2,4-DNP.

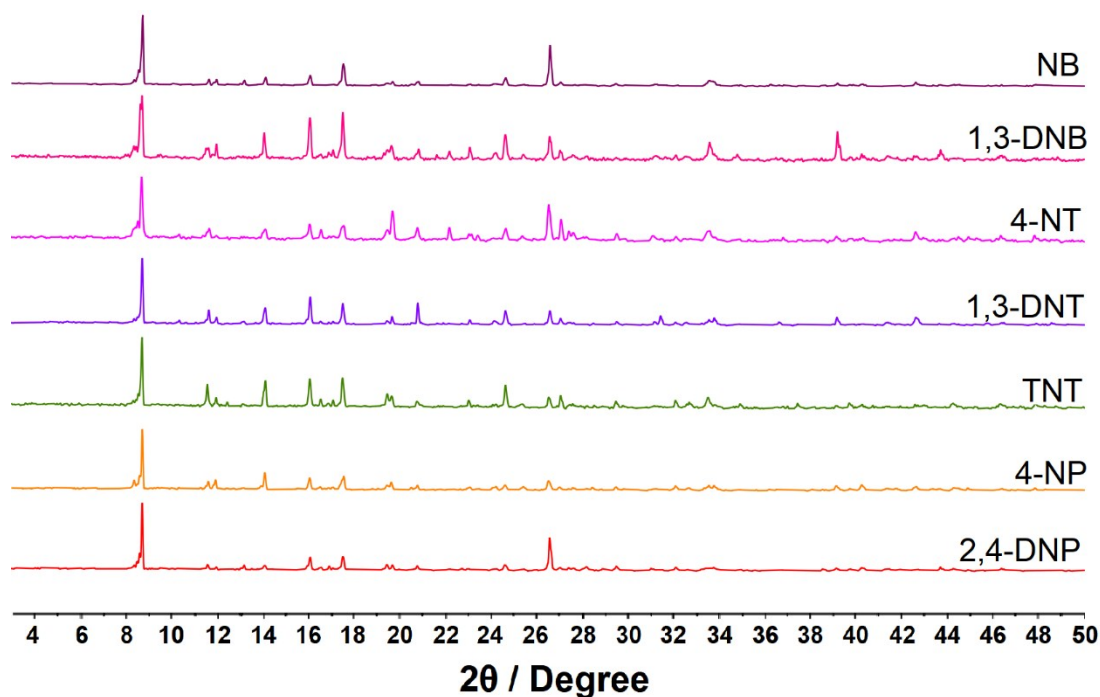

**Figure S16.** The PXRD patterns of TbL and treated by various analytes. (Obtained after immersing in deionized water with various analytes (1 mM) for 12 h)

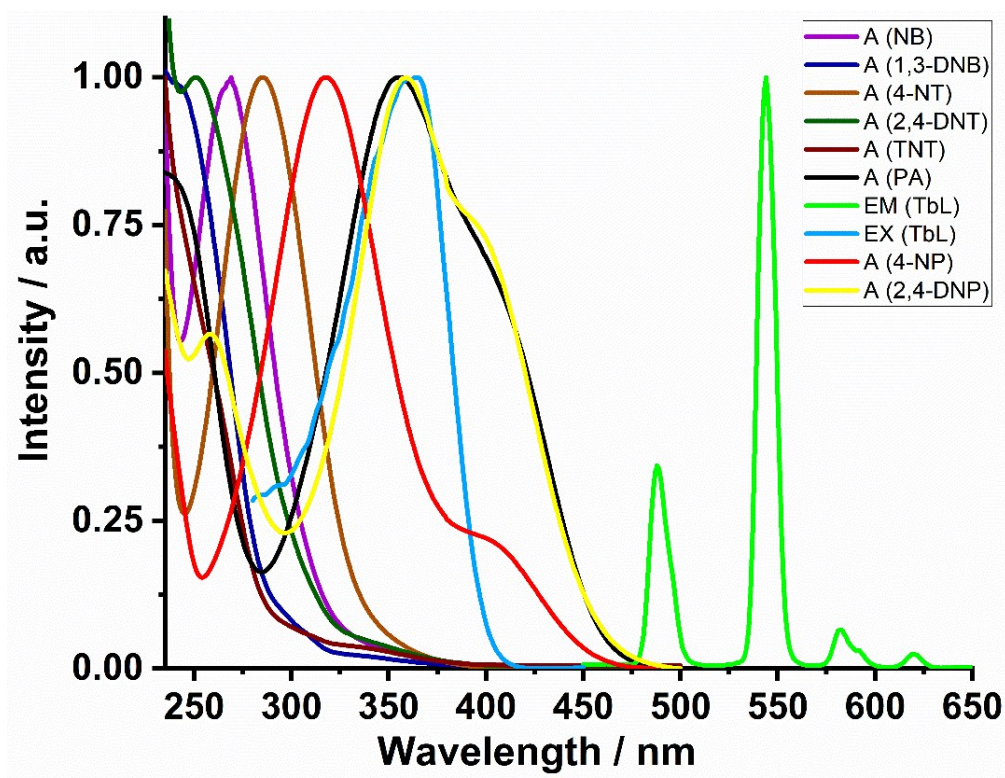

**Figure S17.** Spectral overlap between normalized excitation spectrum and luminescence spectrum of TbL and normalized absorbance spectra of nitro explosives in deionized water.

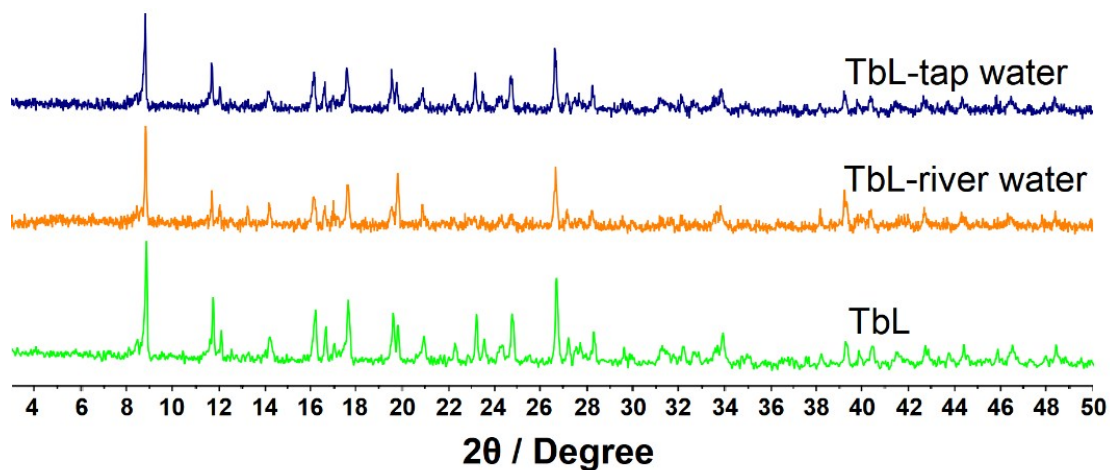

**Figure S18.** The XRD patterns of TbL treated by PA. Obtained after immersing in river water solution and tap water solution with PA (0.5 mM) for 12 h

**Table S1.** Crystal data and structure refinement for TbL.

| Compound                                | TbL                                                               |
|-----------------------------------------|-------------------------------------------------------------------|
| Empirical formula                       | C <sub>17</sub> H <sub>14</sub> N <sub>2</sub> O <sub>12</sub> Tb |
| Formula weight                          | 597.22                                                            |
| Crystal system                          | monoclinic                                                        |
| Space group                             | C2/c                                                              |
| a/Å                                     | 14.354(3)                                                         |
| b/Å                                     | 17.052(2)                                                         |
| c/Å                                     | 16.986(2)                                                         |
| $\alpha$ /°                             | 90                                                                |
| $\beta$ /°                              | 119.674(12)                                                       |
| $\gamma$ /°                             | 90                                                                |
| Volume/Å <sup>3</sup>                   | 3612.2(11)                                                        |
| Z                                       | 8                                                                 |
| D <sub>calc</sub> g/cm <sup>3</sup>     | 2.196                                                             |
| F(000)                                  | 2328.0                                                            |
| Reflections collected                   | 11668                                                             |
| Data/restraints/parameters              | 3300/0/292                                                        |
| Goodness-of-fit on F <sup>2</sup>       | 1.075                                                             |
| Final R indexes [ $I \geq 2\sigma(I)$ ] | R <sub>1</sub> = 0.0309, wR <sub>2</sub> = 0.0815                 |
| Final R indexes [all data]              | R <sub>1</sub> = 0.0341, wR <sub>2</sub> = 0.0835                 |

**Table S2.** The bond lengths for TbL.

| Atom Atom | Length/Å | Atom Atom | Length/Å |
|-----------|----------|-----------|----------|
| Tb1 O6    | 2.302(3) | C27 C28   | 1.486(5) |
| Tb1 O5    | 2.285(3) | C27 C29   | 1.390(5) |
| Tb1 O1    | 2.511(3) | C28 O2    | 1.279(5) |
| Tb1 C28   | 2.882(4) | N14 C21   | 1.375(5) |
| Tb1 O21   | 2.383(3) | N14 C222  | 1.397(5) |
| Tb1 O2    | 2.521(3) | C13 C14   | 1.498(5) |
| Tb1 O8    | 2.347(3) | C24 C25   | 1.514(5) |
| Tb1 O9    | 2.441(3) | C24 C23   | 1.399(5) |
| Tb1 O7    | 2.349(3) | C20 C14   | 1.397(6) |
| C26 C27   | 1.402(5) | N23 C21   | 1.360(5) |
| C26 C24   | 1.386(5) | C14 C15   | 1.382(6) |
| O6 C17    | 1.240(5) | C29 C22   | 1.389(5) |
| O12 C21   | 1.231(5) | C25 O4    | 1.256(5) |
| O5 C13    | 1.249(5) | C25 O3    | 1.272(5) |
| O11 C13   | 1.267(5) | C23 C22   | 1.400(5) |
| O1 C28    | 1.263(5) | C18 C16   | 1.395(6) |

|     |     |          |     |      |          |
|-----|-----|----------|-----|------|----------|
| C19 | C20 | 1.399(5) | C15 | C16  | 1.394(6) |
| C19 | N23 | 1.407(5) | C16 | C173 | 1.475(5) |
| C19 | C18 | 1.396(5) | O10 | C17  | 1.285(5) |

<sup>1</sup>2-X,-Y,-Z; <sup>2</sup>-1/2+X,-1/2-Y,-1/2+Z; <sup>3</sup>-1/2+X,1/2-Y,-1/2+Z

**Table S3.** The bond angles for TbL.

| Atom | Atom | Atom | Angle/°    | Atom | Atom | Atom | Angle/°    |
|------|------|------|------------|------|------|------|------------|
| O6   | Tb1  | O1   | 107.45(9)  | C26  | C27  | C28  | 121.5(3)   |
| O6   | Tb1  | C28  | 131.05(10) | C29  | C27  | C26  | 120.6(3)   |
| O6   | Tb1  | O21  | 117.64(10) | C29  | C27  | C28  | 117.9(3)   |
| O6   | Tb1  | O2   | 144.81(10) | O1   | C28  | Tb1  | 60.37(19)  |
| O6   | Tb1  | O8   | 145.54(11) | O1   | C28  | C27  | 122.0(3)   |
| O6   | Tb1  | O9   | 70.65(10)  | O1   | C28  | O2   | 118.6(3)   |
| O6   | Tb1  | O7   | 76.20(11)  | C27  | C28  | Tb1  | 160.4(3)   |
| O5   | Tb1  | O6   | 77.43(10)  | O2   | C28  | Tb1  | 60.87(19)  |
| O5   | Tb1  | O1   | 158.55(10) | O2   | C28  | C27  | 119.3(3)   |
| O5   | Tb1  | C28  | 150.40(10) | C21  | N14  | C222 | 125.6(3)   |
| O5   | Tb1  | O21  | 78.21(10)  | O5   | C13  | O11  | 125.1(4)   |
| O5   | Tb1  | O2   | 133.46(9)  | O5   | C13  | C14  | 118.7(3)   |
| O5   | Tb1  | O8   | 78.62(10)  | O11  | C13  | C14  | 116.2(4)   |
| O5   | Tb1  | O9   | 124.84(10) | C26  | C24  | C25  | 120.5(3)   |
| O5   | Tb1  | O7   | 91.00(11)  | C26  | C24  | C23  | 120.5(3)   |
| O1   | Tb1  | C28  | 25.92(10)  | C23  | C24  | C25  | 119.0(3)   |
| O1   | Tb1  | O2   | 51.47(8)   | Tb11 | O2   | Tb1  | 114.65(10) |
| O21  | Tb1  | O1   | 115.46(9)  | C28  | O2   | Tb11 | 152.3(2)   |
| O2   | Tb1  | C28  | 26.31(10)  | C28  | O2   | Tb1  | 92.8(2)    |
| O21  | Tb1  | C28  | 91.60(10)  | C14  | C20  | C19  | 119.7(3)   |
| O21  | Tb1  | O2   | 65.35(10)  | C21  | N23  | C19  | 125.7(3)   |
| O21  | Tb1  | O9   | 78.48(10)  | C20  | C14  | C13  | 119.9(3)   |
| O8   | Tb1  | O1   | 87.11(10)  | C15  | C14  | C13  | 119.2(3)   |
| O8   | Tb1  | C28  | 72.30(11)  | C15  | C14  | C20  | 120.8(3)   |
| O8   | Tb1  | O2   | 68.19(10)  | C22  | C29  | C27  | 120.5(3)   |
| O8   | Tb1  | O21  | 80.77(10)  | O12  | C21  | N14  | 123.4(3)   |
| O8   | Tb1  | O9   | 143.79(10) | O12  | C21  | N23  | 124.0(4)   |
| O8   | Tb1  | O7   | 79.83(11)  | N23  | C21  | N14  | 112.6(3)   |
| O9   | Tb1  | O1   | 75.66(10)  | O4   | C25  | C24  | 119.5(3)   |
| O9   | Tb1  | C28  | 78.94(10)  | O4   | C25  | O3   | 122.9(3)   |
| O9   | Tb1  | O2   | 76.24(9)   | O3   | C25  | C24  | 117.5(3)   |
| O7   | Tb1  | O1   | 70.60(10)  | C24  | C23  | C22  | 120.2(3)   |

|     |     |     |            |      |     |      |          |
|-----|-----|-----|------------|------|-----|------|----------|
| O7  | Tb1 | C28 | 89.26(11)  | C16  | C18 | C19  | 119.6(3) |
| O7  | Tb1 | O2  | 113.16(10) | C14  | C15 | C16  | 119.3(4) |
| O7  | Tb1 | O21 | 159.33(11) | C18  | C16 | C173 | 121.0(3) |
| O7  | Tb1 | O9  | 121.87(11) | C15  | C16 | C18  | 120.7(4) |
| C24 | C26 | C27 | 118.9(3)   | C15  | C16 | C173 | 118.2(4) |
| C17 | O6  | Tb1 | 169.2(3)   | O6   | C17 | C164 | 120.1(3) |
| C13 | O5  | Tb1 | 151.2(3)   | O6   | C17 | O10  | 123.2(4) |
| C28 | O1  | Tb1 | 93.7(2)    | O10  | C17 | C164 | 116.7(4) |
| C20 | C19 | N23 | 123.3(3)   | N145 | C22 | C23  | 123.4(3) |
| C18 | C19 | C20 | 119.7(4)   | C29  | C22 | N145 | 117.5(3) |
| C18 | C19 | N23 | 116.9(3)   | C29  | C22 | C23  | 119.1(3) |

<sup>1</sup>2-X,-Y,-Z; <sup>2</sup>-1/2+X,-1/2-Y,-1/2+Z; <sup>3</sup>-1/2+X,1/2-Y,-1/2+Z; <sup>4</sup>1/2+X,1/2-Y,1/2+Z; <sup>5</sup>1/2+X,-1/2-Y,1/2+Z

## References

- [1] (a) Q. Zhu, C. Shen, C. Tan, T. Sheng, S. Hu and X. Wu, *Chem. Commun.*, 2012, **48**, 531–533; (b) J. C. Mello, H. F. Wittmann and R. H. Friend, *Adv. Mater.*, 1997, **9**, 230–232; (c) H. B. Zhang, L. J. Zhou, J. Wei, Z. H. Li, P. Lin and S. W. Du, *J. Mater. Chem.*, 2012, **22**, 21210-21217.
- [2] G. M. Sheldrick, A short history of SHELX, *Acta Crystallogr. Sect. A*, 2008, **64**, 112-122.
